# Supplementary material
Source: ML conference proceedings conference paper supplement (https://proceedings.mlr.press/v80/odonoghue18a.html)

## Appendix

### Proof of Lemma 1

For ease of exposition in this derivation we shall use the notation  $\mathbf{E}_t(\cdot)$  to denote the expectation of a random variable conditioned on the history  $\mathcal{F}_t$ , rather than the usual  $\mathbf{E}(\cdot|\mathcal{F}_t)$ .

Recall that if we sample  $\hat{\mu}$  from the posterior over the mean rewards  $\phi_{\mu|\mathcal{F}_t}$ , and  $\hat{P}$  from the posterior over the transition probability matrix  $\phi_{P|\mathcal{F}_t}$  then the Q-values that are the unique solution to

$$\hat{Q}_{sa}^{\pi} = \hat{\mu}_{sa} + \gamma \sum_{s'} \pi_{s'a'} \hat{P}_{s'sa} \hat{Q}_{s'a'}^{\pi}$$

are a sample from the (implicit) posterior over Q-values, conditioned on  $\mathcal{F}_t$  (Strens, 2000). Using the definition of the conditional variance

$$\begin{aligned} \mathbf{var}_t \hat{Q}_{sa}^{\pi} &= \mathbf{E}_t \left( \hat{Q}_{sa}^{\pi} - \mathbf{E}_t \hat{Q}_{sa}^{\pi} \right)^2 \\ &= \mathbf{E}_t \left( \hat{\mu}_{sa} - \mathbf{E}_t \hat{\mu}_{sa} + \gamma \sum_{s',a'} \pi_{s'a'} (\hat{P}_{s'sa} \hat{Q}_{s'a'}^{\pi} - \mathbf{E}_t \hat{P}_{s'sa} \hat{Q}_{s'a'}^{\pi}) \right)^2 \\ &= \mathbf{E}_t \left( \hat{\mu}_{sa} - \mathbf{E}_t \hat{\mu}_{sa} \right)^2 + \gamma^2 \mathbf{E}_t \left( \sum_{s',a'} \pi_{s'a'} (\hat{P}_{s'sa} \hat{Q}_{s'a'}^{\pi} - \mathbf{E}_t \hat{P}_{s'sa} \hat{Q}_{s'a'}^{\pi}) \right)^2 \\ &\leq \mathbf{var}_t \hat{\mu}_{sa} + \gamma^2 \sum_{s',a'} \pi_{s'a'} \mathbf{E}_t \left( \hat{P}_{s'sa} \hat{Q}_{s'a'}^{\pi} - \mathbf{E}_t \hat{P}_{s'sa} \hat{Q}_{s'a'}^{\pi} \right)^2 \end{aligned}$$

where we have used the fact that  $\hat{\mu}_{sa}$  is conditionally independent (conditioned on  $\mathcal{F}_t$ ) of  $\hat{P}_{s'sa} \hat{Q}_{s'a'}^{\pi}$  because assumption 1 implies that  $\hat{Q}_{s'a'}^{\pi}$  depends only on downstream quantities, and in the last line we used Jensen's inequality. Assumption 1 also implies that that  $\hat{P}_{s'sa}$  and  $\hat{Q}_{s'a'}^{\pi}$  are conditionally independent, and so we can write the expectation in the last term above as

$$\begin{aligned} \mathbf{E}_t \left( \hat{P}_{s'sa} \hat{Q}_{s'a'}^{\pi} - \mathbf{E}_t \hat{P}_{s'sa} \hat{Q}_{s'a'}^{\pi} \right)^2 &= \mathbf{E}_t \left( (\hat{P}_{s'sa} - \mathbf{E}_t \hat{P}_{s'sa}) \hat{Q}_{s'a'}^{\pi} + (\mathbf{E}_t \hat{P}_{s'sa}) (\hat{Q}_{s'a'}^{\pi} - \mathbf{E}_t \hat{Q}_{s'a'}^{\pi}) \right)^2 \\ &= \mathbf{E}_t \left( (\hat{P}_{s'sa} - \mathbf{E}_t \hat{P}_{s'sa}) \hat{Q}_{s'a'}^{\pi} \right)^2 + \mathbf{E}_t \left( (\mathbf{E}_t \hat{P}_{s'sa}) (\hat{Q}_{s'a'}^{\pi} - \mathbf{E}_t \hat{Q}_{s'a'}^{\pi}) \right)^2. \end{aligned}$$

Now using the conditional independence property again and the fact that the Q-values are bounded, as implied by assumption 2, we have

$$\mathbf{E}_t \left( (\hat{P}_{s'sa} - \mathbf{E}_t \hat{P}_{s'sa}) \hat{Q}_{s'a'}^{\pi} \right)^2 = \mathbf{E}_t \left( \hat{P}_{s'sa} - \mathbf{E}_t \hat{P}_{s'sa} \right)^2 \mathbf{E}_t \left( \hat{Q}_{s'a'}^{\pi} \right)^2 \leq Q_{\max}^2 \mathbf{var}_t \hat{P}_{s'sa},$$

and since  $P_{s'sa} \in [0, 1]$  we have

$$\mathbf{E}_t \left( (\mathbf{E}_t \hat{P}_{s'sa}) (\hat{Q}_{s'a'}^{\pi} - \mathbf{E}_t \hat{Q}_{s'a'}^{\pi}) \right)^2 = (\mathbf{E}_t \hat{P}_{s'sa})^2 \mathbf{E}_t \left( \hat{Q}_{s'a'}^{\pi} - \mathbf{E}_t \hat{Q}_{s'a'}^{\pi} \right)^2 \leq \mathbf{E}_t (\hat{P}_{s'sa}) \mathbf{var}_t \hat{Q}_{s'a'}^{\pi}.$$

Putting it all together we obtain

$$\mathbf{var}_t \hat{Q}_{sa}^{\pi} \leq \sigma_{sa}^2 + \gamma^2 \sum_{s',a'} \pi_{s'a'} \mathbf{E}_t (\hat{P}_{s'sa}) \mathbf{var}_t \hat{Q}_{s'a'}^{\pi}$$

where  $\sigma_{sa}^2$  is the *local* uncertainty, and is given by

$$\sigma_{sa}^2 = \mathbf{var}_t \hat{\mu}_{sa} + \gamma^2 Q_{\max}^2 \sum_{s'} \mathbf{var}_t \hat{P}_{s'sa}.$$

The Uncertainty Bellman Equation and Exploration

Atari suite scores

| Game              | DQN             | DQN Intrinsic Motivation | DQN UBE 1-step  | DQN UBE n-step |
|-------------------|-----------------|--------------------------|-----------------|----------------|
| alien             | 40.96           | 28.13                    | <b>46.90</b>    | 43.61          |
| amidar            | 58.17           | 41.50                    | <b>83.48</b>    | 83.14          |
| assault           | 479.34          | 647.16                   | 887.18          | <b>1112.28</b> |
| asterix           | 67.26           | 74.01                    | 82.34           | <b>130.95</b>  |
| asteroids         | 1.86            | 2.25                     | <b>3.54</b>     | 2.61           |
| atlantis          | <b>28662.58</b> | 14382.27                 | <b>28655.71</b> | 6889.77        |
| bank heist        | 56.43           | 54.20                    | 97.72           | <b>162.90</b>  |
| battle zone       | 70.47           | 77.80                    | 49.63           | <b>101.68</b>  |
| beam rider        | 63.22           | 58.60                    | 106.79          | <b>149.93</b>  |
| berzerk           | 18.29           | 21.30                    | 44.92           | <b>2284.45</b> |
| bowling           | 13.03           | <b>20.10</b>             | -3.64           | 14.12          |
| boxing            | 782.87          | 784.74                   | 811.68          | <b>816.42</b>  |
| breakout          | 1438.45         | 1377.36                  | <b>2045.13</b>  | 1474.66        |
| centipede         | <b>34.54</b>    | 25.04                    | 22.62           | 18.94          |
| chopper command   | 58.06           | 74.19                    | 69.67           | <b>75.90</b>   |
| crazy climber     | 428.59          | 431.10                   | 496.21          | <b>499.34</b>  |
| defender          | 83.94           | 78.20                    | 94.54           | <b>209.70</b>  |
| demon attack      | 338.43          | 372.29                   | 765.46          | <b>897.89</b>  |
| double dunk       | 481.10          | 575.90                   | 750.00          | <b>1031.25</b> |
| enduro            | 92.01           | 102.36                   | 9.94            | <b>154.21</b>  |
| fishing derby     | 85.03           | 95.68                    | 97.51           | <b>105.80</b>  |
| freeway           | 81.08           | 121.85                   | 0.02            | <b>126.41</b>  |
| frostbite         | 9.86            | 16.02                    | 11.26           | <b>21.22</b>   |
| gopher            | 392.09          | 558.74                   | 656.70          | <b>867.45</b>  |
| gravitar          | 2.38            | 4.07                     | 2.06            | <b>4.91</b>    |
| hero              | 49.27           | <b>63.34</b>             | 47.63           | 34.58          |
| ice hockey        | 64.17           | <b>64.49</b>             | 38.22           | 58.43          |
| jamesbond         | 193.96          | 230.36                   | 198.40          | <b>430.89</b>  |
| kangaroo          | 266.39          | 311.21                   | 202.79          | <b>537.69</b>  |
| krull             | 656.32          | 702.15                   | <b>1033.61</b>  | 838.45         |
| kung fu master    | 103.20          | 112.79                   | 128.30          | <b>153.40</b>  |
| montezuma revenge | -0.49           | 4.21                     | <b>11.43</b>    | 0.80           |
| ms pacman         | 16.11           | 16.17                    | 18.42           | <b>19.82</b>   |
| name this game    | 114.24          | 101.23                   | <b>129.62</b>   | 127.99         |
| phoenix           | 115.17          | 157.34                   | <b>199.39</b>   | 167.51         |
| pitfall           | <b>5.49</b>     | <b>5.49</b>              | <b>5.49</b>     | <b>5.49</b>    |
| pong              | 112.04          | 112.06                   | <b>116.32</b>   | <b>116.37</b>  |
| private eye       | -0.04           | <b>0.44</b>              | -0.44           | 0.33           |
| qbert             | 79.41           | 103.53                   | 124.96          | <b>125.85</b>  |
| riverraid         | 43.41           | 46.33                    | 60.73           | <b>68.24</b>   |
| road runner       | 524.43          | 531.48                   | 722.15          | <b>732.09</b>  |
| robotank          | 770.41          | 779.94                   | 414.29          | <b>803.06</b>  |
| seaquest          | 7.93            | <b>10.61</b>             | 9.01            | 9.31           |
| skiing            | 11.47           | 15.26                    | 31.55           | <b>54.31</b>   |
| solaris           | 3.48            | 8.23                     | <b>18.56</b>    | -6.53          |
| space invaders    | 87.42           | 72.95                    | 125.29          | <b>138.65</b>  |
| star gunner       | 309.47          | 398.98                   | 456.86          | <b>547.39</b>  |
| surround          | 16.67           | 19.44                    | 37.42           | <b>60.98</b>   |
| tennis            | 145.58          | 145.58                   | <b>227.93</b>   | 145.58         |
| time pilot        | 92.53           | 76.73                    | 88.36           | <b>121.64</b>  |
| tutankham         | 148.29          | <b>191.72</b>            | 132.62          | 138.12         |
| up n down         | 92.62           | 95.73                    | 139.35          | <b>142.12</b>  |
| venture           | 4.05            | <b>10.77</b>             | -1.24           | 8.73           |
| video pinball     | 1230.64         | 2393.54                  | <b>3354.58</b>  | 1992.87        |
| wizard of wor     | 73.26           | 73.96                    | <b>187.48</b>   | 118.76         |
| yars revenge      | 37.93           | 23.24                    | <b>46.21</b>    | 44.36          |
| zaxxon            | 35.24           | 53.14                    | <b>62.20</b>    | 56.44          |

Table 2: Normalized scores for the Atari suite from random starts, as a percentage of human normalized score.

Atari suite learning curves

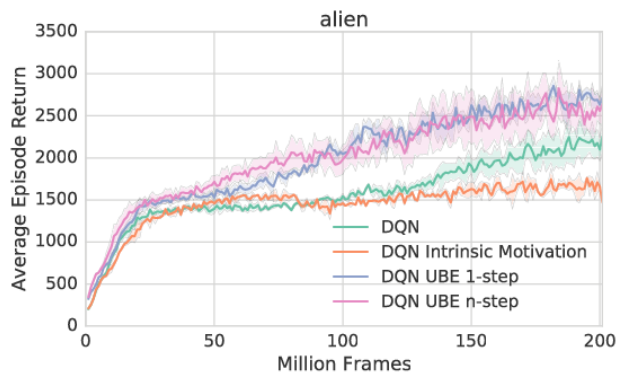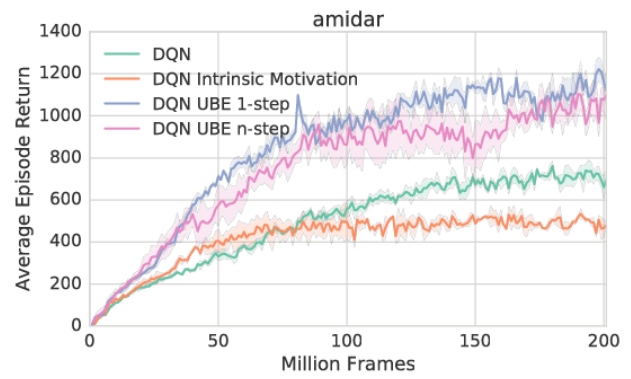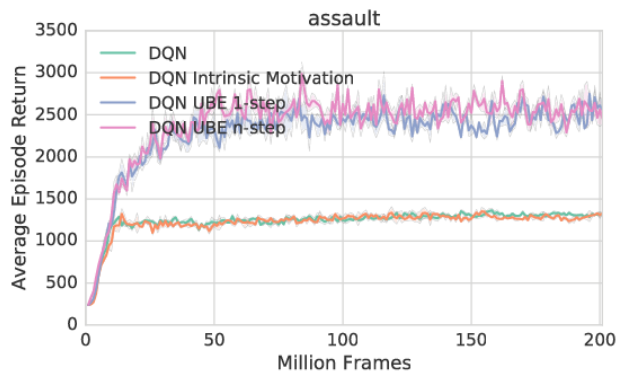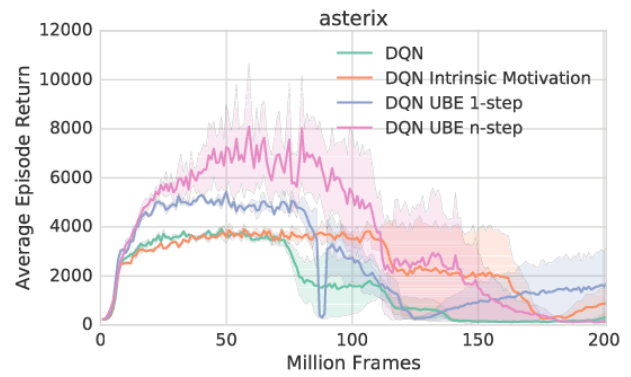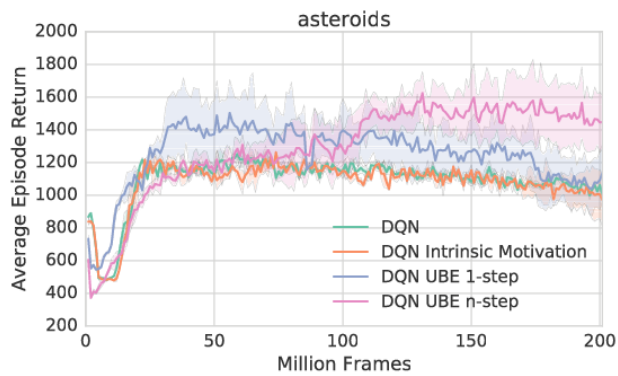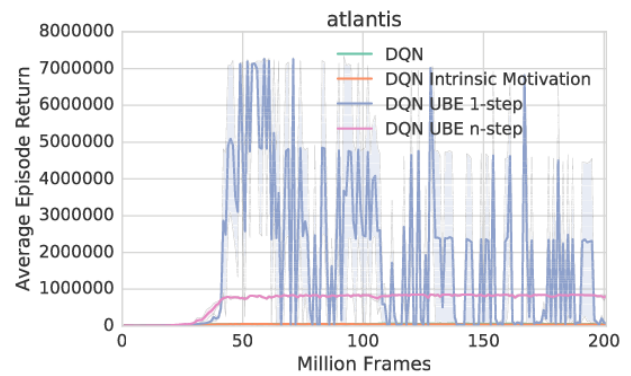

# The Uncertainty Bellman Equation and Exploration

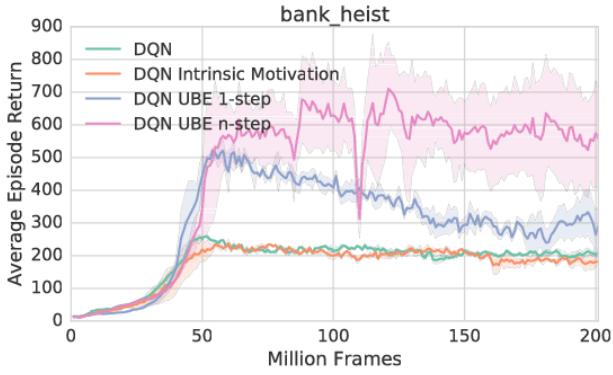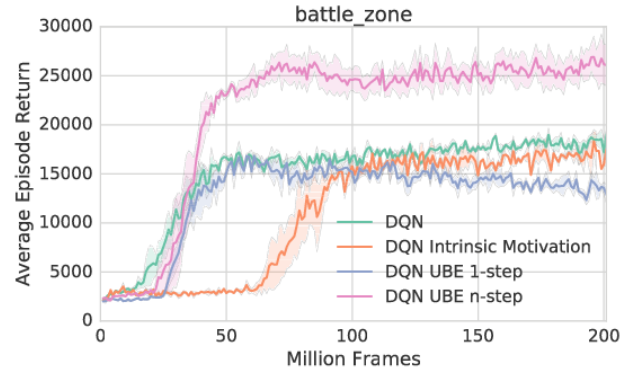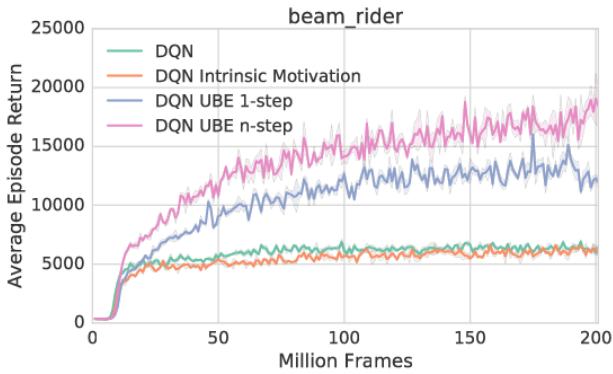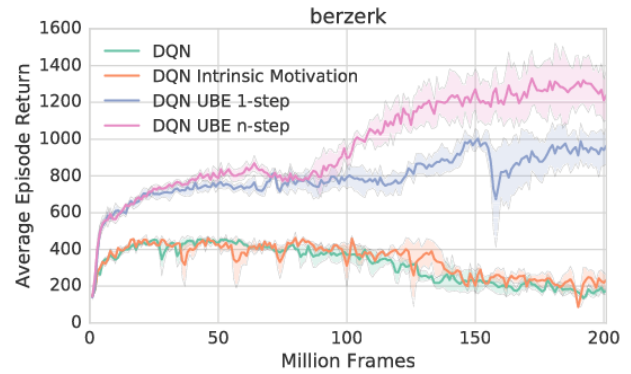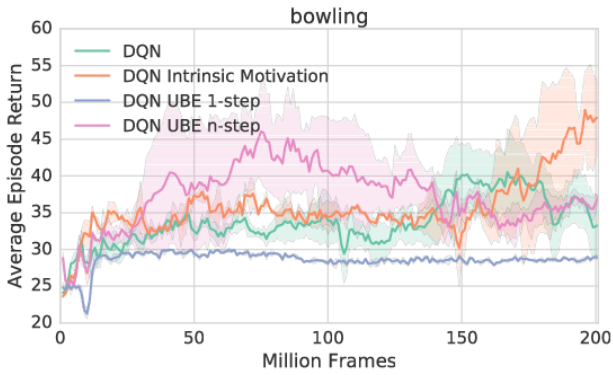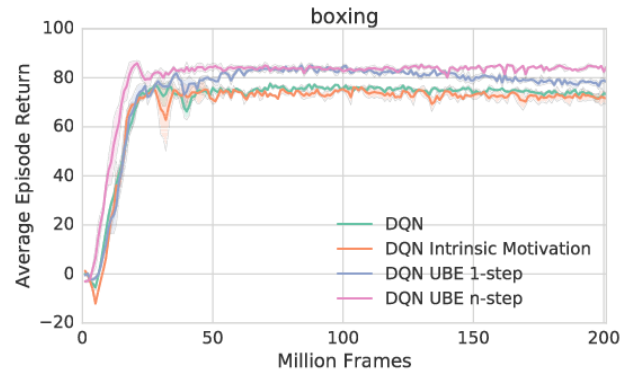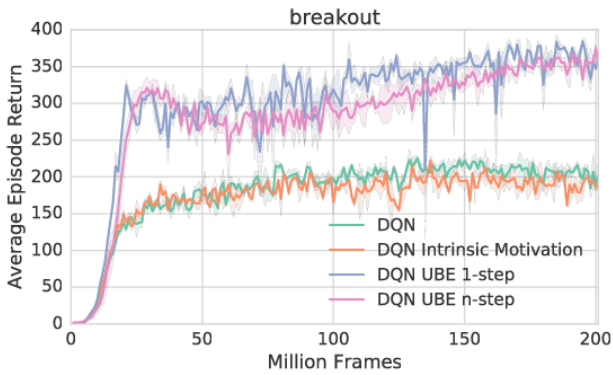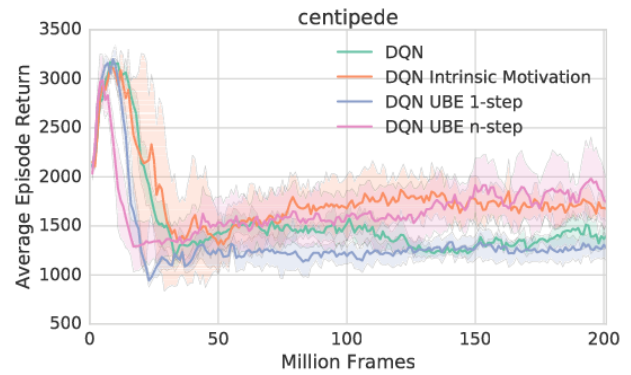

# The Uncertainty Bellman Equation and Exploration

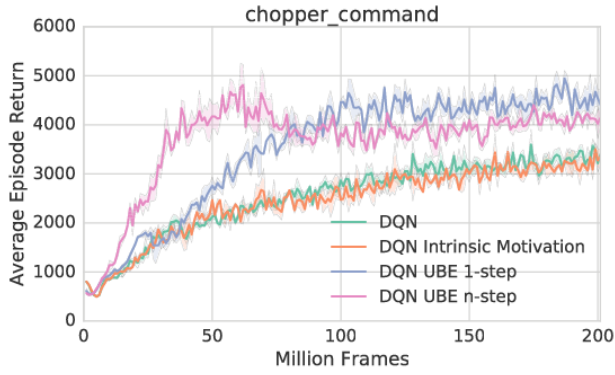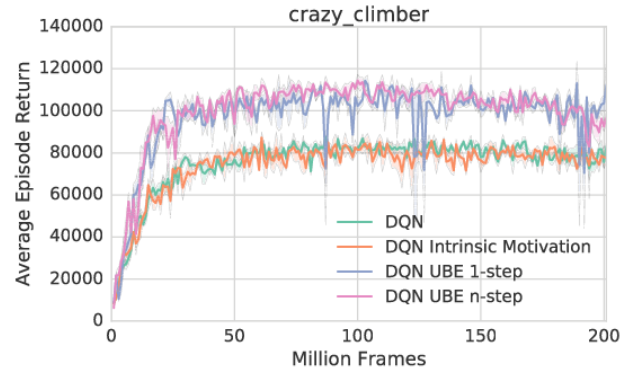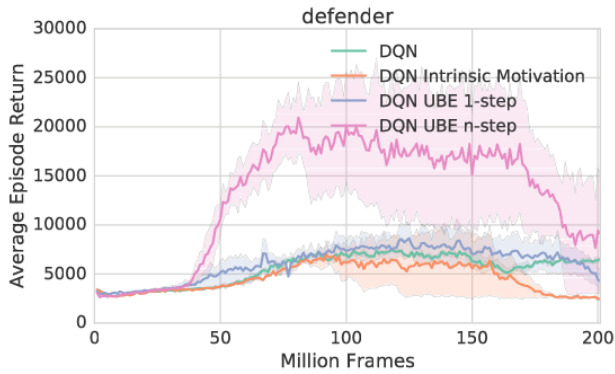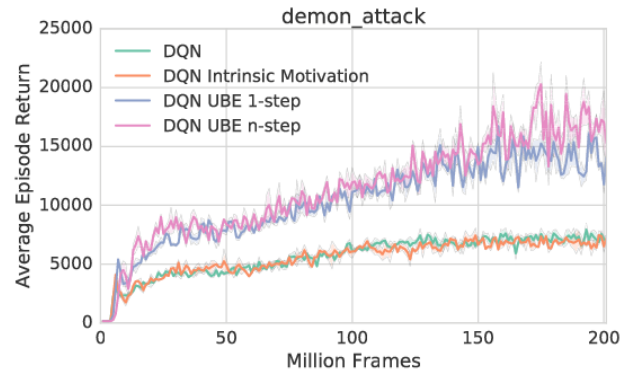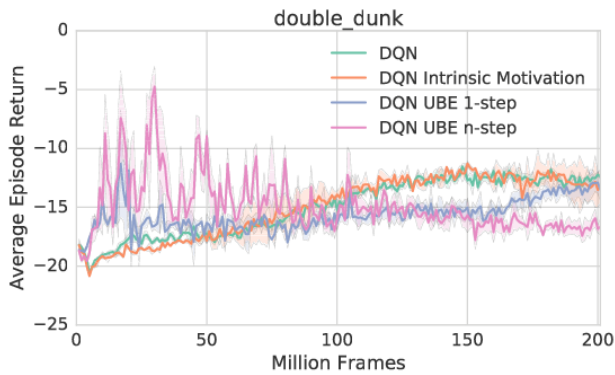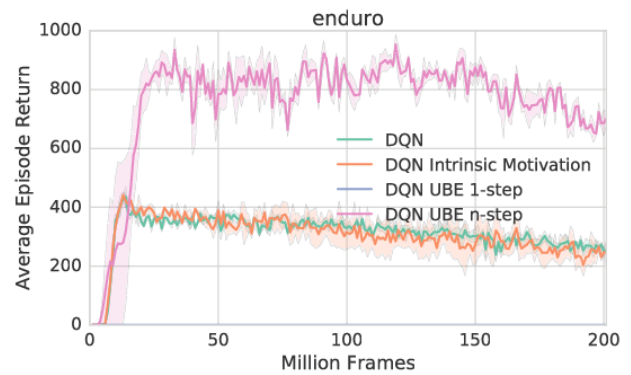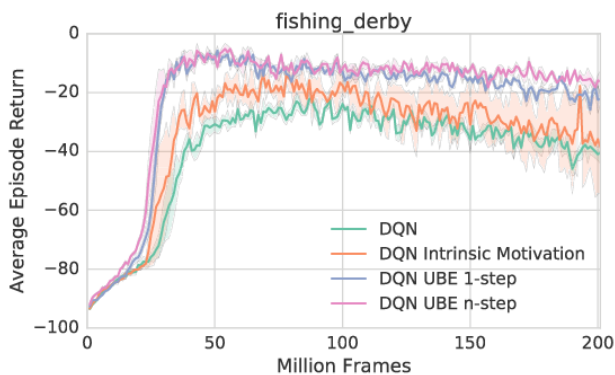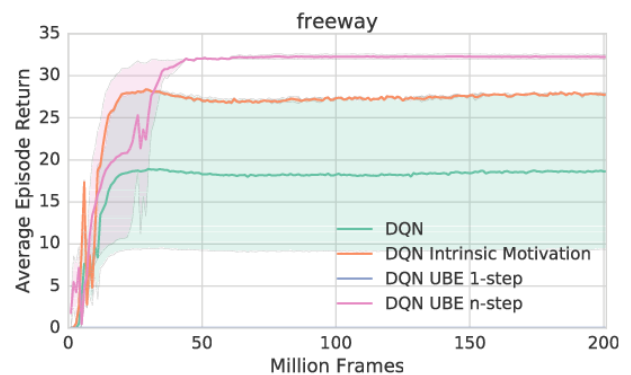

# The Uncertainty Bellman Equation and Exploration

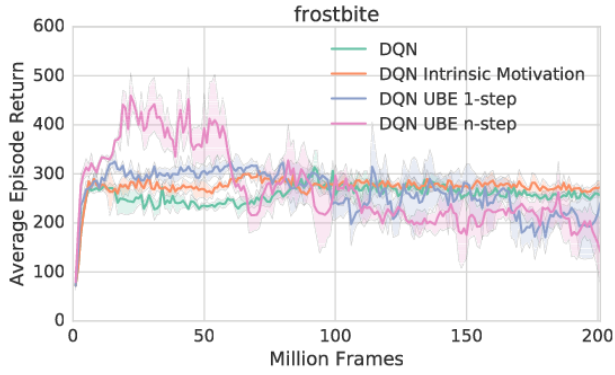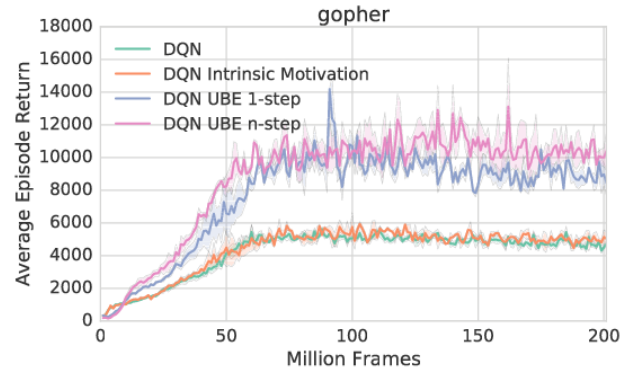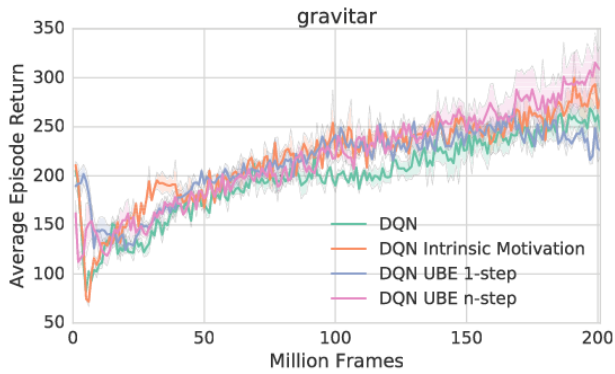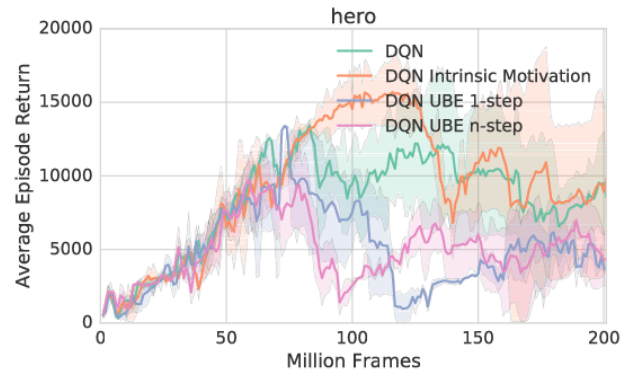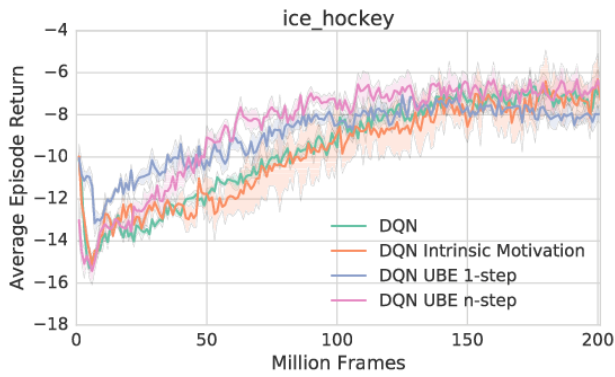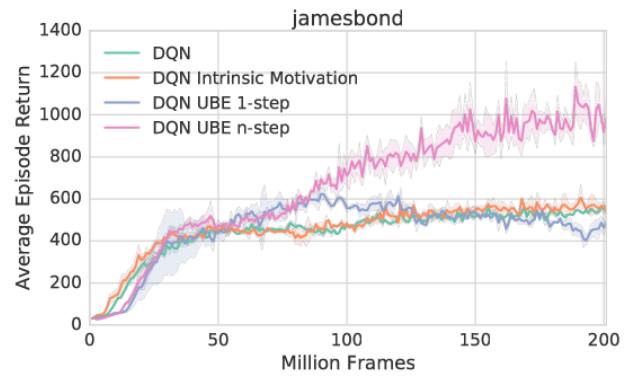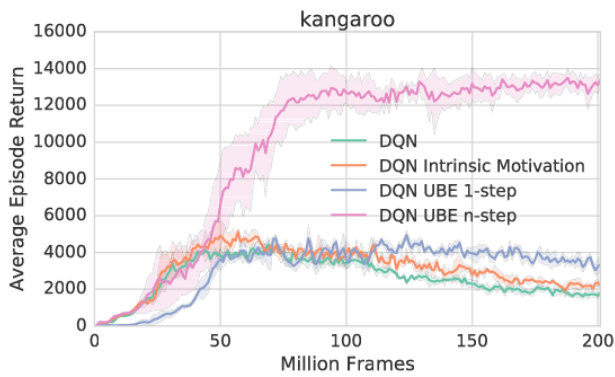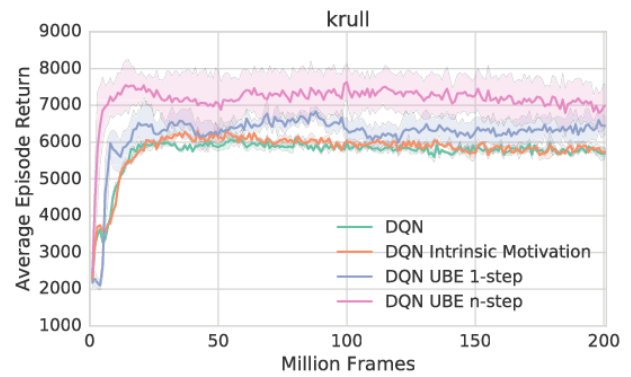

# The Uncertainty Bellman Equation and Exploration

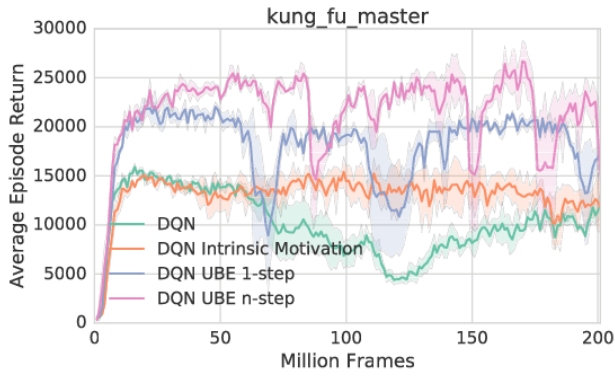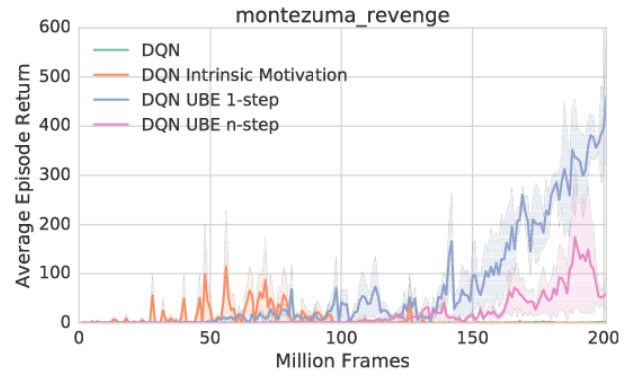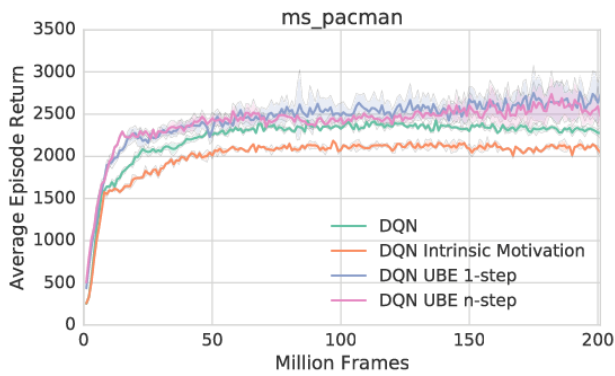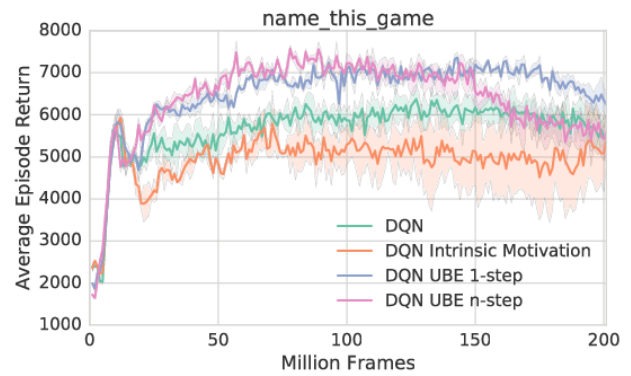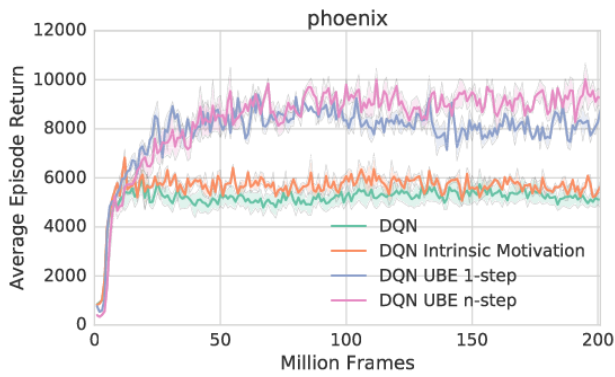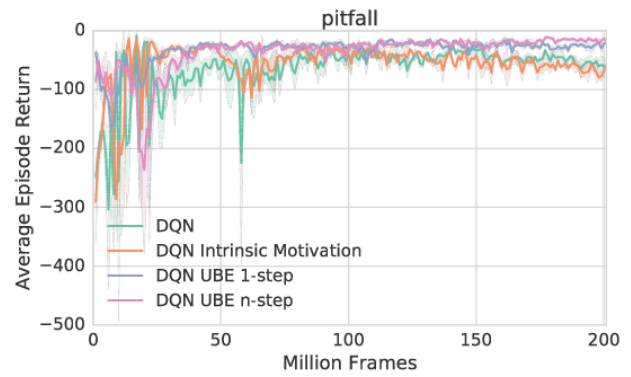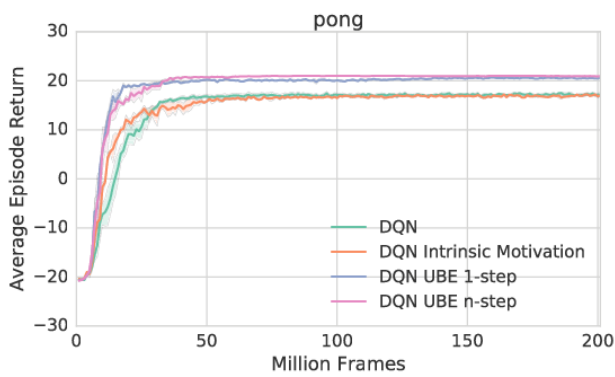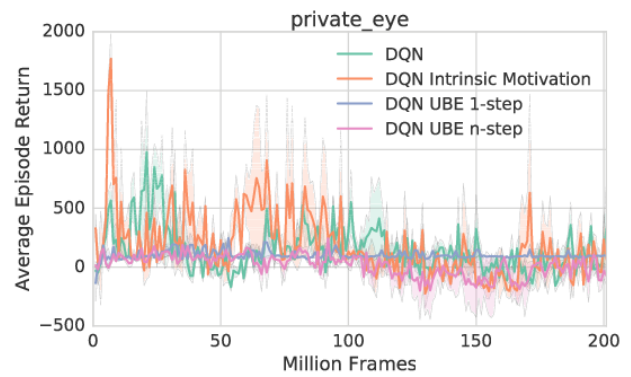

# The Uncertainty Bellman Equation and Exploration

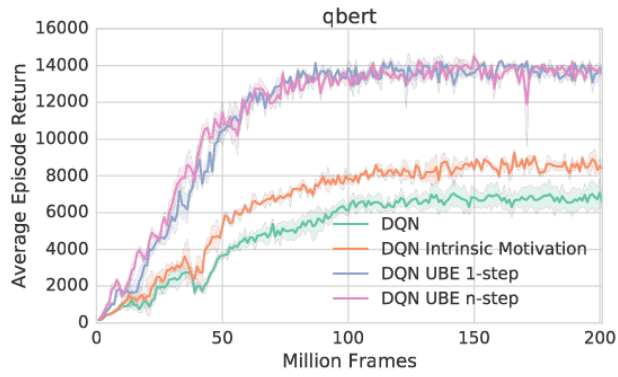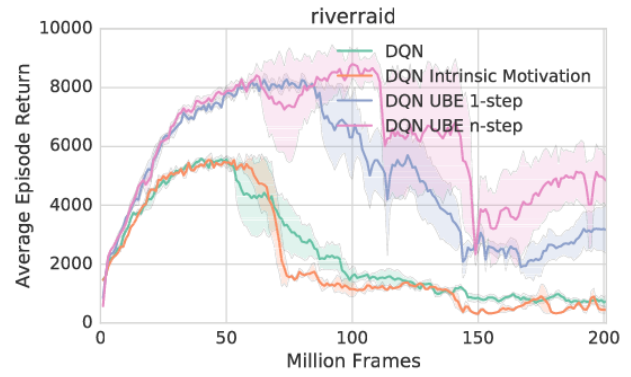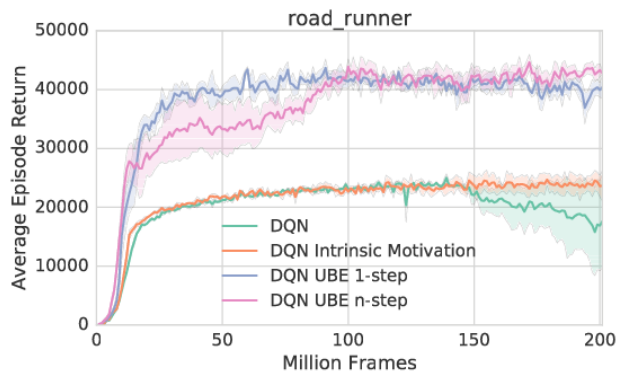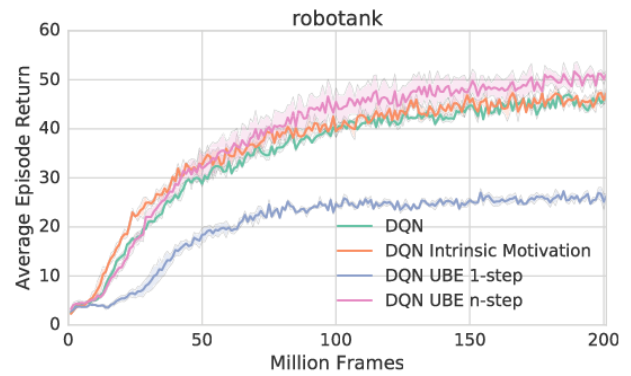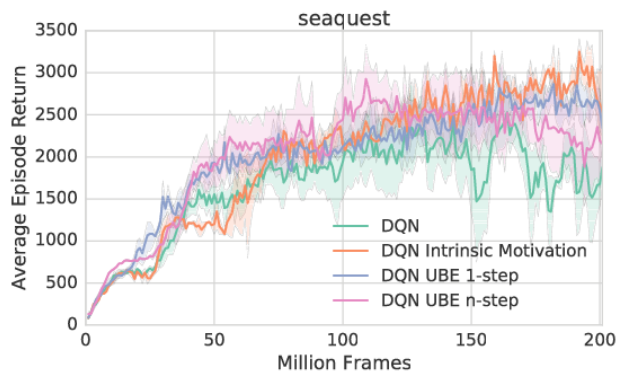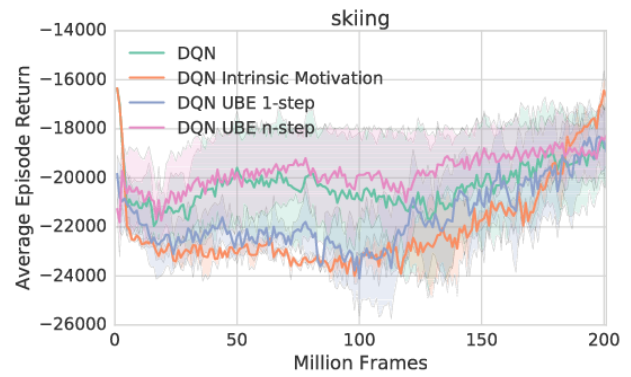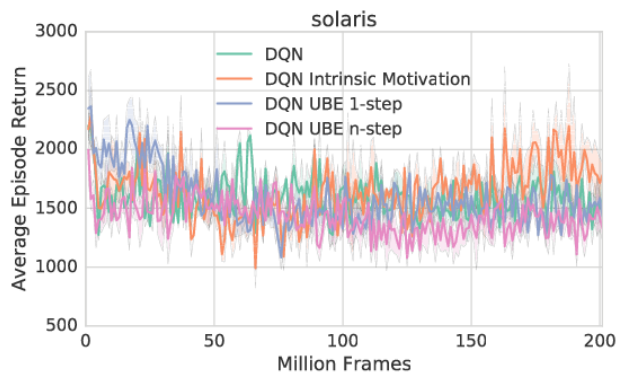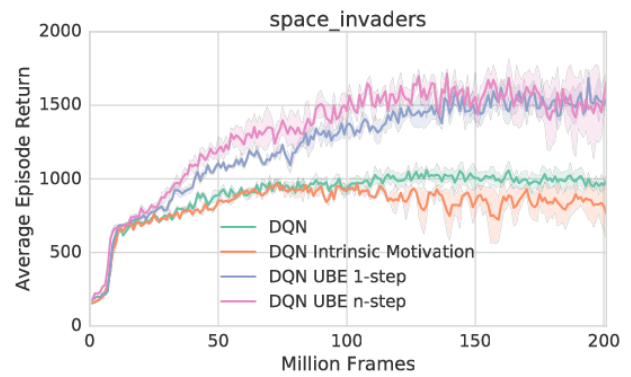



# The Uncertainty Bellman Equation and Exploration

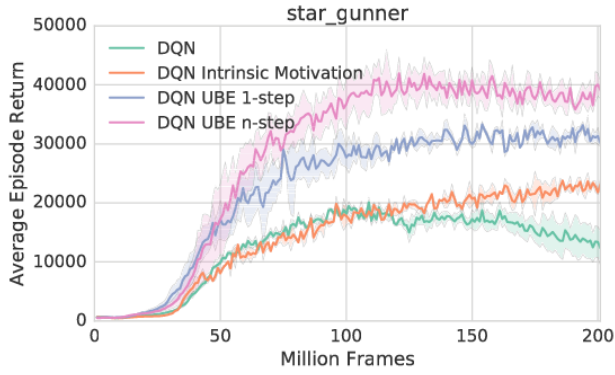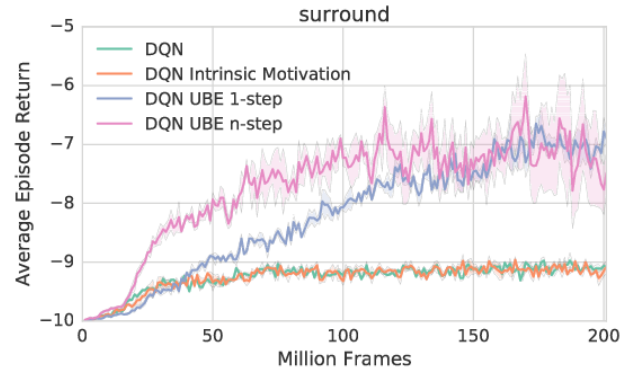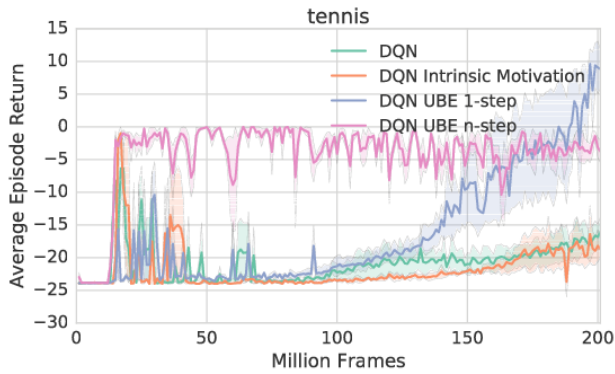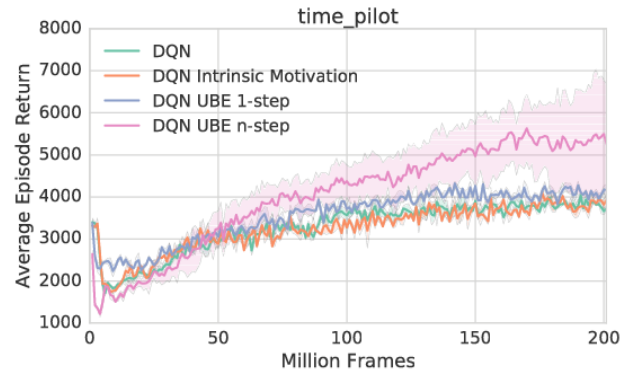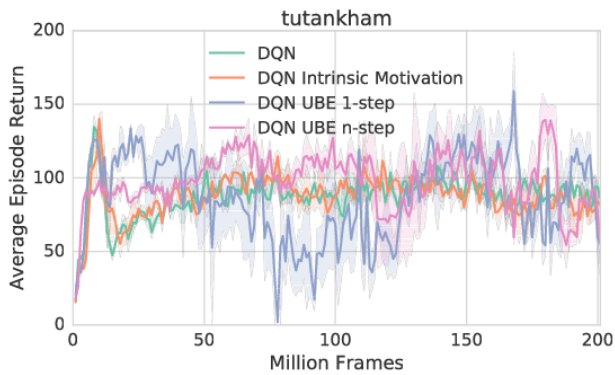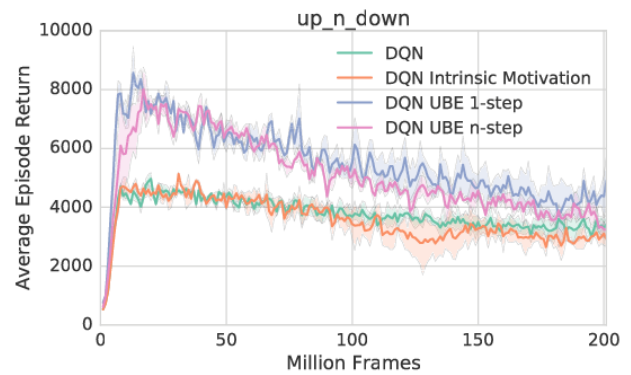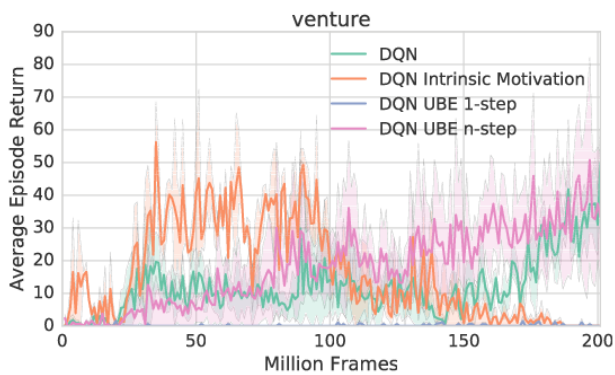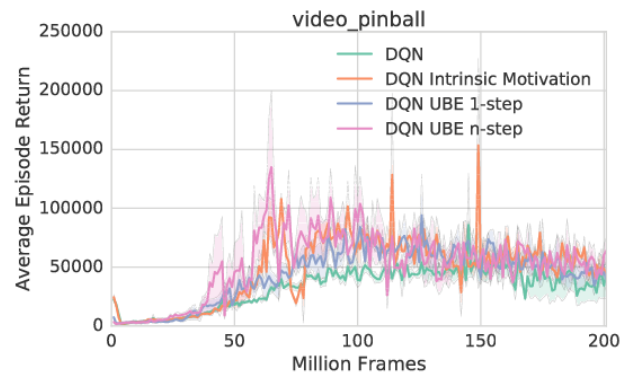

# The Uncertainty Bellman Equation and Exploration

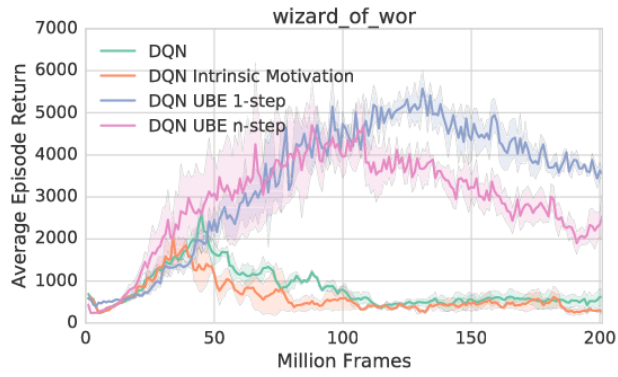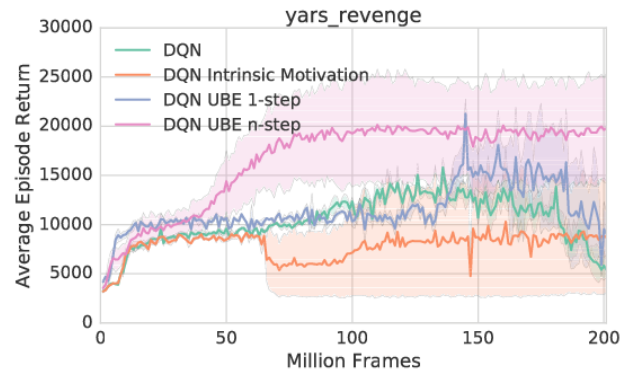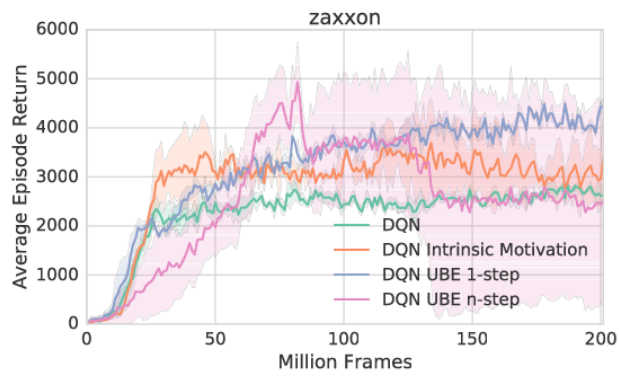

Supplement: Supplementary file [file odonoghue18a-supp.pdf]
